# Supplementary material
Source: PubMed Central journal article supplement (PMC3592575)
Supplement: NIHMS363516-supplement-1_si_002.pdf [file NIHMS363516-supplement-1_si_002.pdf]

## *Supporting Information for*

Elucidating the role of C-terminal post-translational modifications using protein semisynthesis strategies:  $\alpha$ -synuclein phosphorylation at Tyrosine 125

Mirva Hejjaoui <sup>#1</sup>, Sara Butterfield <sup>#1</sup>, Bruno Fauvet <sup>1</sup>, Filip Vercauteren <sup>1</sup>, Jia Cui <sup>2</sup>, Igor Dikiy <sup>3</sup>, Michel Prudent <sup>1</sup>, Diana Olschewski <sup>1</sup>, Yan Zhang <sup>2</sup>, David Eliezer <sup>3</sup> and Hilal A. Lashuel <sup>1\*</sup>

# These authors contributed equally to this work

<sup>1</sup> Laboratory of Molecular and Chemical Biology of Neurodegeneration, Brain Mind Institute, Ecole Polytechnique Fédérale de Lausanne (EPFL), CH-1015 Lausanne, Switzerland

<sup>2</sup> Laboratory of Neurobiology and State Key Laboratory of Biomembrane and Membrane Biotechnology, College of Life Sciences, Peking University, Beijing, China

<sup>3</sup> Department of Biochemistry and Program in Structural Biology, Weill Cornell Medical College, New York, New York 10021, USA

\* Corresponding author: hilal.lashuel@epfl.ch

- I. Synthesis and characterization of  $\alpha$ -syn C-terminal peptides
- II. Generation of  $\alpha$ -syn (1-106)SR N<sup>15</sup> labeled and non-labeled
- III. Semisynthesis and purification of WT  $\alpha$ -syn T and pY125  $\alpha$ -syn
- IV. Generation of  $\alpha$ -syn A107C <sup>15</sup>N labeled and Semisynthesis of  $\alpha$ -syn A107C\_pY125 <sup>15</sup>N labeled.
- V. TEM images of recombinant and semisynthetic  $\alpha$ -syn after 7 days of aggregation
- VI. Analysis of HEK, HeLa cells and mouse neurons treated with pervanadate: detection of non-specific bands
- VII. Cross-talk between  $\alpha$ -syn phosphorylation at S87 and Y125: *in vitro* phosphorylation assay
- VIII. Complete references 5, 20, 34, 44 and 49

## I. Synthesis and characterization of $\alpha$ -syn C-terminal peptides

### **Peptide: $\alpha$ -Syn(A107C-140)**

*sequence:* CPQEGILEDMPVDPDNEAYEMPSEEGYQDYEPEA

*synthetic specifications:* couplings used HBTU; double couplings performed at Cys107, Glu109, Met-116, Asp-119, and Met-127

*yield:* 25%

*expected mass:* 3886 Da

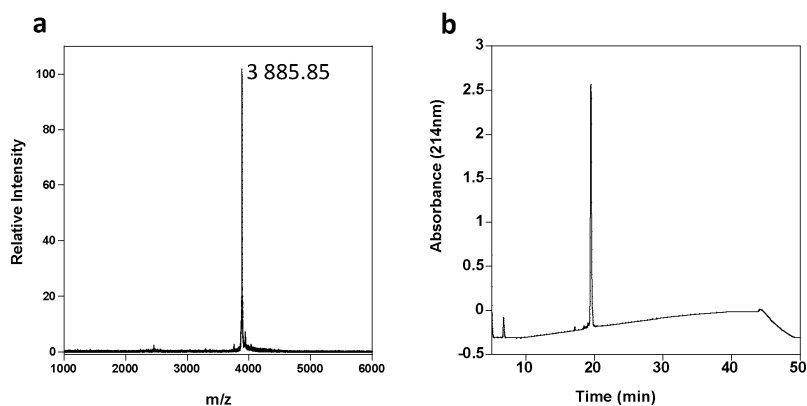

*Figure S1.* a) MALDI-TOF analysis (observed mass=3885.85Da) and b) RP-HPLC analysis of purified  $\alpha$ -syn A107C-140 on a C<sub>18</sub> analytical column (CosmoSil Protein-R, 4.6x250 mm, 5 $\mu$ m particle size) with a linear gradient of 0 to 80%B over 30min (A: water/0.1%TFA and B: acetonitrile/0.1% TFA).

**Peptide:  $\alpha$ -syn(A107C-140)<sub>p</sub>Y125**

*sequence:* CPQEGILEDMPVDPDNEA-pY-EMPSEEGYQDYEP EA

*synthetic specifications:* see above

*yield:* 25%

*expected mass:* 3969 Da

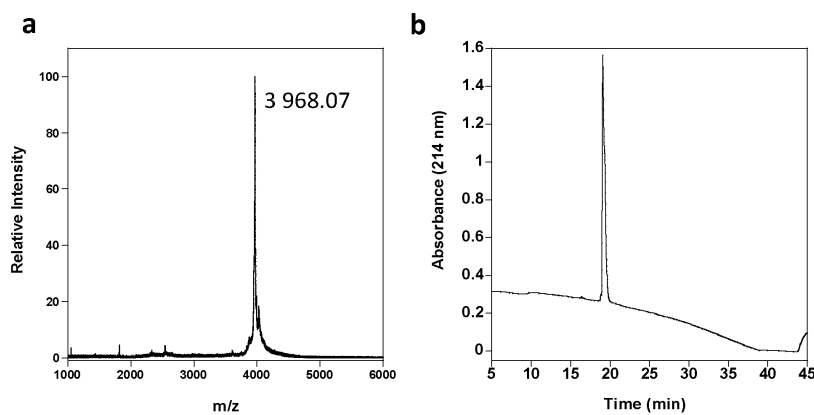

*Figure S2.* a) MALDI-TOF analysis (observed mass= 3968 Da). b) RP-HPLC analysis of purified  $\alpha$ -syn A107C-140<sub>p</sub>Y125 on a C<sub>18</sub> analytical column (CosmoSil Protein-R, 4.6x250 mm, 5 $\mu$ m particle size) with a linear gradient of 0 to 80%B over 30min (A: water/0.1% TFA and B: acetonitrile/0.1% TFA).

## II. Generation of $^{15}\text{N}$ -labeled $\alpha$ -syn(1-106)SR and non-labeled $\alpha$ -syn(1-106)SR

### Non-labeled $\alpha$ -syn(1-106)SR

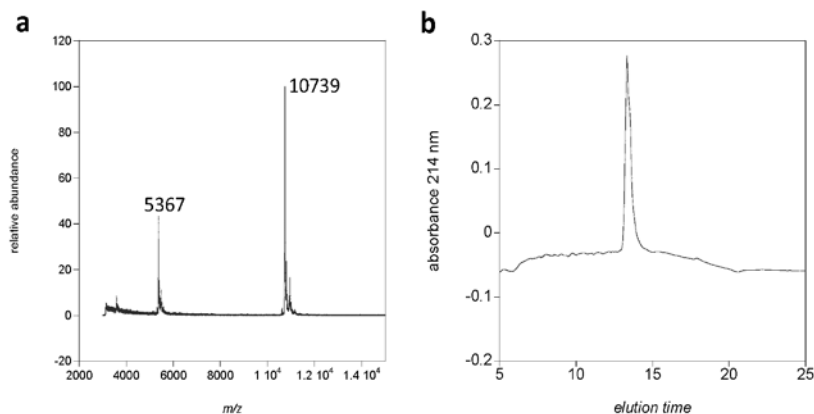

*Figure S3.* a) MALDI-TOF analysis (observed mass= 10739). The mass 5367 corresponds to the double-charged. b) RP-HPLC analysis of purified  $\alpha$ -syn(1-106)SR on a  $\text{C}_4$  analytical column (CosmoSil 5 $\text{C}_4$ ) with a linear gradient of 0 to 80%B over 15min (A: water/0.1% TFA and B: acetonitrile/0.1% TFA).

### $^{15}\text{N}$ labeled $\alpha$ -syn (1-106)SR

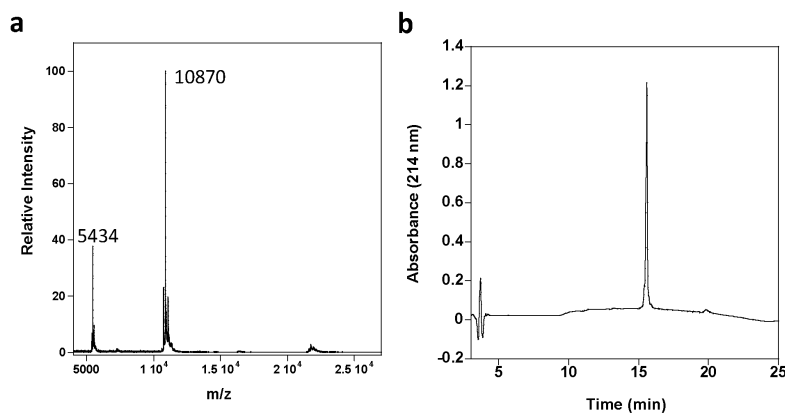

*Figure S4.* a) MALDI-TOF analysis (observed mass= 10870). The mass 5434 corresponds to the double-charged. b) RP-HPLC analysis of purified  $\alpha$ -syn(1-106)SR  $^{15}\text{N}$  labeled on a  $\text{C}_4$  analytical column with a linear gradient of 0 to 80%B over 30min (A: water/0.1% TFA and B: acetonitrile/0.1% TFA)

### III. Semisynthesis and purification of WT $\alpha$ -syn and pY125 $\alpha$ -syn

#### $\alpha$ -SynA107C wild-type

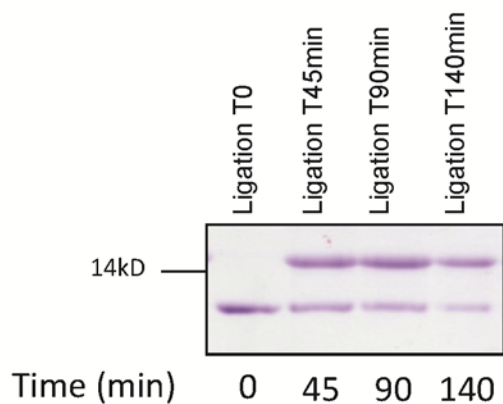

Figure S5. SDS-PAGE analysis of native chemical ligation reaction between  $\alpha$ -syn(1-106)SR and  $\alpha$ -syn(A107C-140).

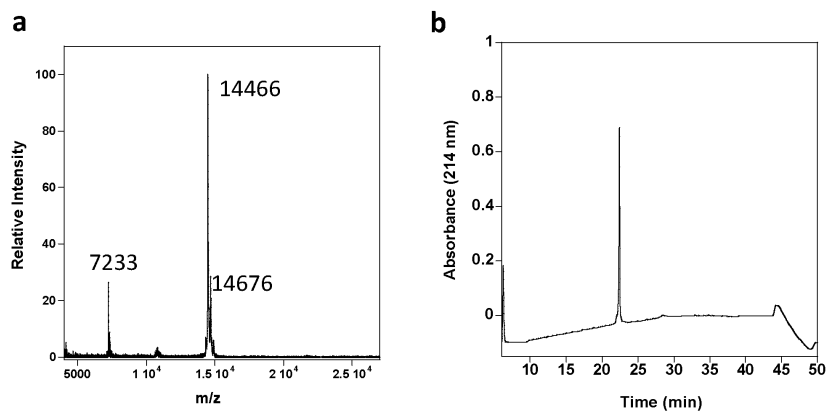

Figure S6. a) MALDI-TOF analysis of the desulfurized product (expected mass: 14461). The mass of 14676 corresponds to a sinapinic matrix adduct and the mass of 7233 to the double-charged. b) RP-HPLC of semi-synthetic WT  $\alpha$ -syn on an analytical C18 with a linear gradient of 0 to 80%B over 30min (A: water/0.1%TFA and B: acetonitrile/0.1% TFA).

$\alpha$ -synA107C\_pY125

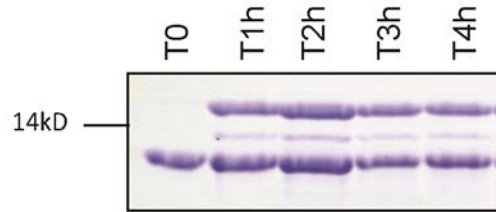

*Figure S7.* SDS-PAGE analysis of native chemical ligation reaction between  $\alpha$ -syn(1-106)SR and  $\alpha$ -syn(A107C-140\_pY125). Note: the ligation corresponding to the gel was done with two molar excess of  $\alpha$ -syn(1-106)SR.

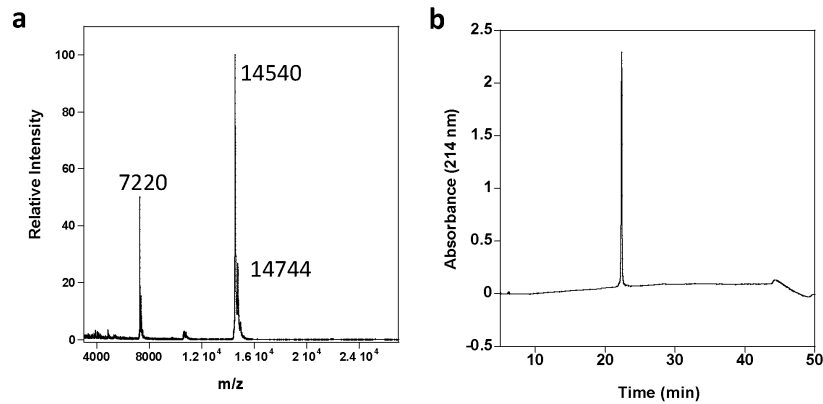

*Figure S8.* a) MALDI-TOF analysis of the desulfurized product (expected mass: 14541). The mass of 14744 corresponds to a sinapinic matrix adduct and the mass of 7220 to the double-charged. b) RP-HPLC of semi-synthetic pY125  $\alpha$ -syn on an analytical C18 with a linear gradient of 0 to 80%B over 30min (A: water/0.1% TFA and B: acetonitrile/0.1% TFA).

## General scheme of ligation and purification

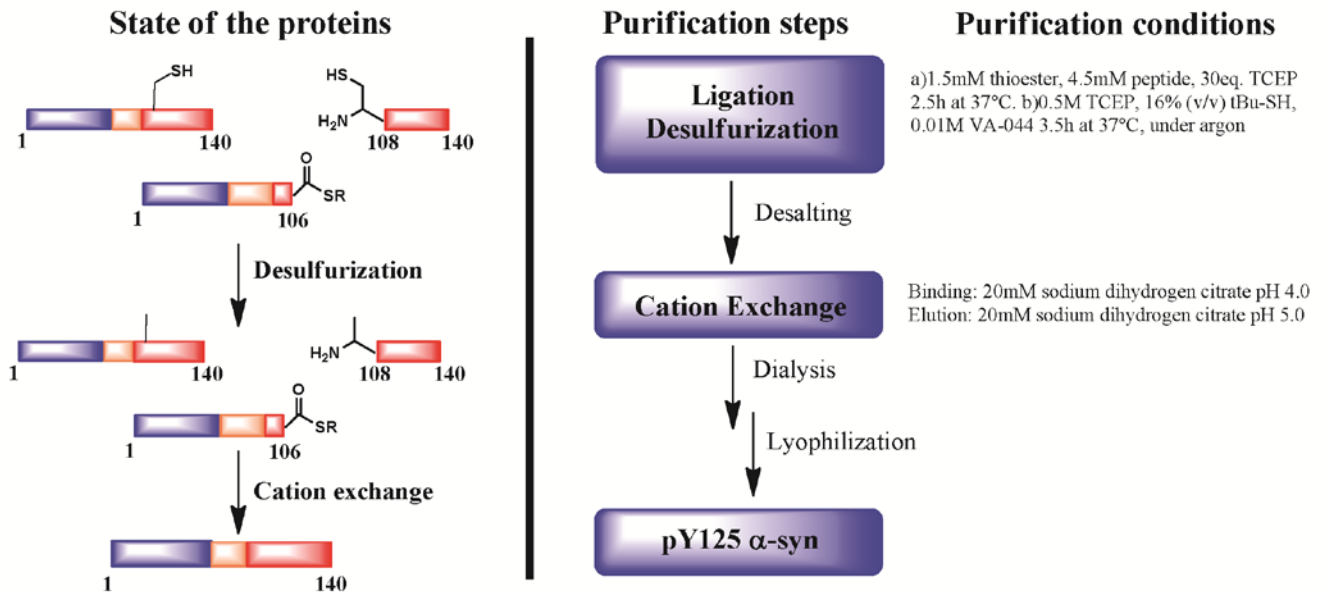

Figure S9. Scheme of the main steps for the generation of pY125 α-syn: ligation, desulfurization and purification by chromatographic methods.



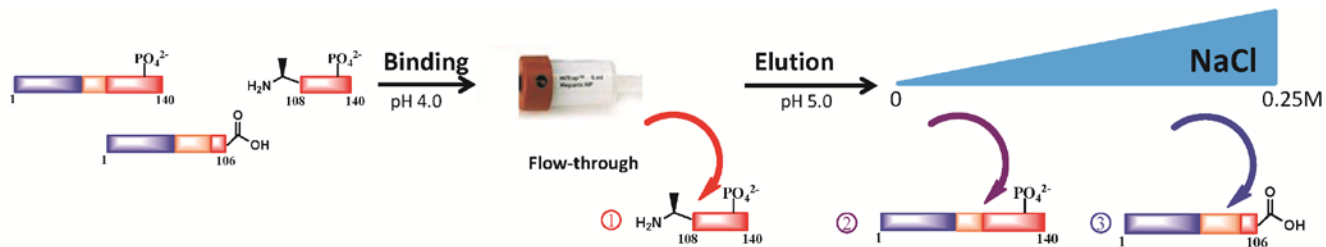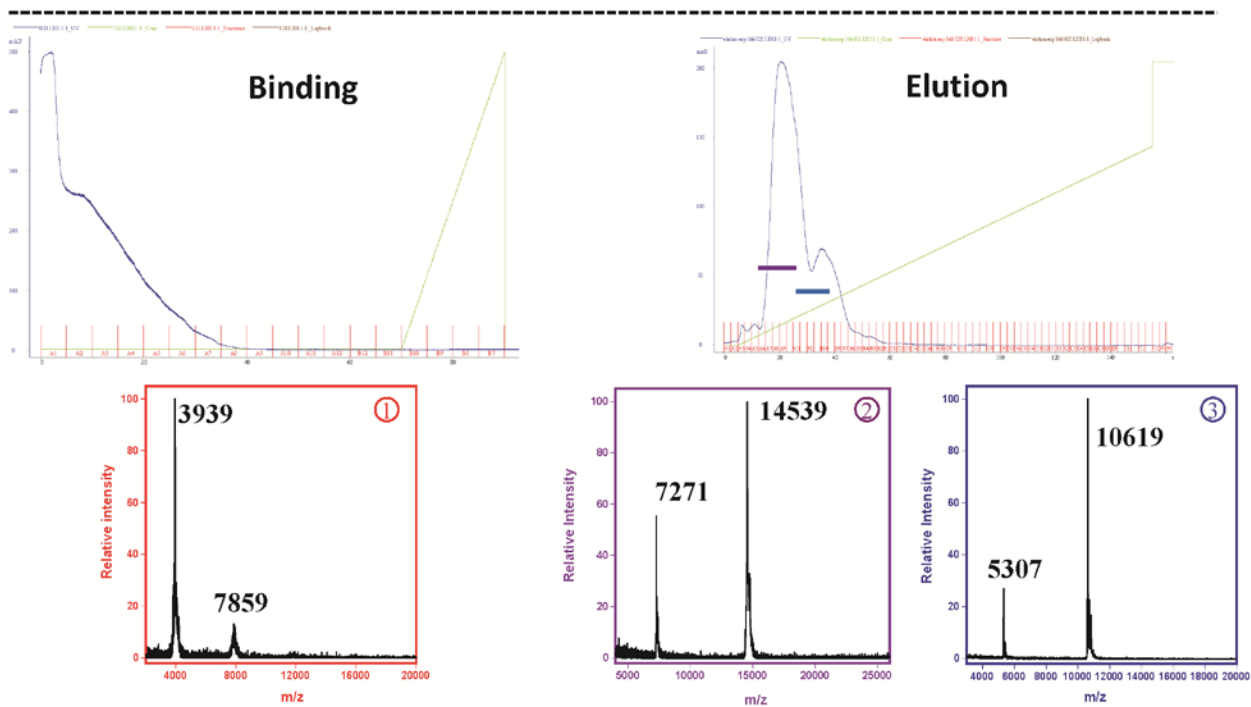

Figure S10. Scheme of the cation-exchange chromatography purification of pY125  $\alpha$ -syn.

**A**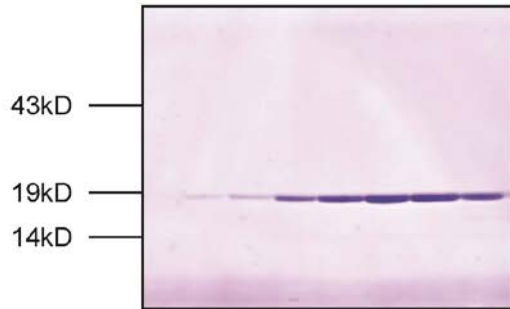**B**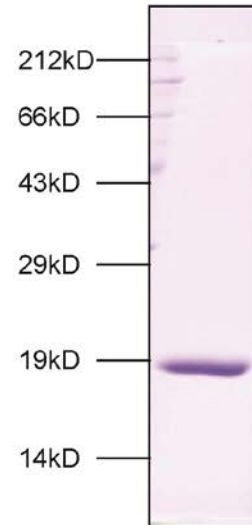

*Figure S11.* A: SDS-PAGE analysis of the fractions containing pY125  $\alpha$ -syn (eluting from the cation exchange column at pH 5). B: SDS-PAGE analysis of the pure lyophilized pY125  $\alpha$ -syn.

#### IV. Generation of $\alpha$ -syn A107C N<sup>15</sup> labeled and Semisynthesis of $\alpha$ -syn A107C\_pY125 N<sup>15</sup> labeled.

##### $\alpha$ -synA107C <sup>15</sup>N labeled

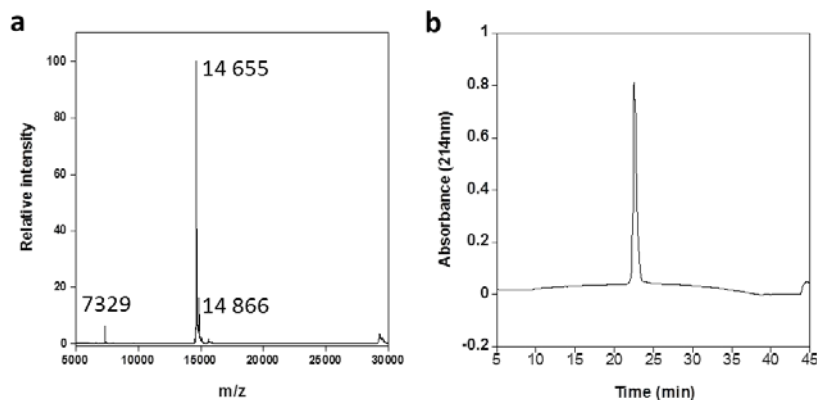

Figure S12. a) MALDI-TOF analysis of the protein (expected mass: 14659). The mass of 14866 corresponds to a sinapinic matrix adduct and the mass of 7329 to the double-charged. b) RP-HPLC of <sup>15</sup>N labeled  $\alpha$ -syn A107C on an analytical Protein-R C<sub>18</sub> column with a linear gradient of 0 to 80%B over 30min (A: water/0.1%TFA and B: acetonitrile/0.1% TFA).

##### $\alpha$ -synA107C\_pY125 <sup>15</sup>N labeled

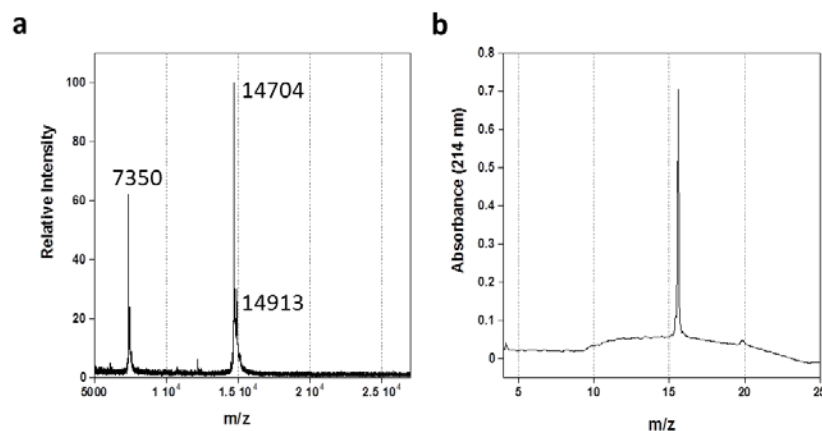

Figure S13. a) MALDI-TOF analysis of the ligated product (expected mass: 14701). The mass of 14913 corresponds to a sinapinic matrix adduct and the mass of 7350 to the double-charged. b) RP-HPLC of semi-synthetic pY125  $\alpha$ -syn <sup>15</sup>N labeled on an analytical Protein-R C<sub>18</sub> column with a linear gradient of 0 to 80%B over 30min (A: water/0.1%TFA and B: acetonitrile/0.1% TFA).

V. TEM images of recombinant and semisynthetic WT  $\alpha$ -syn

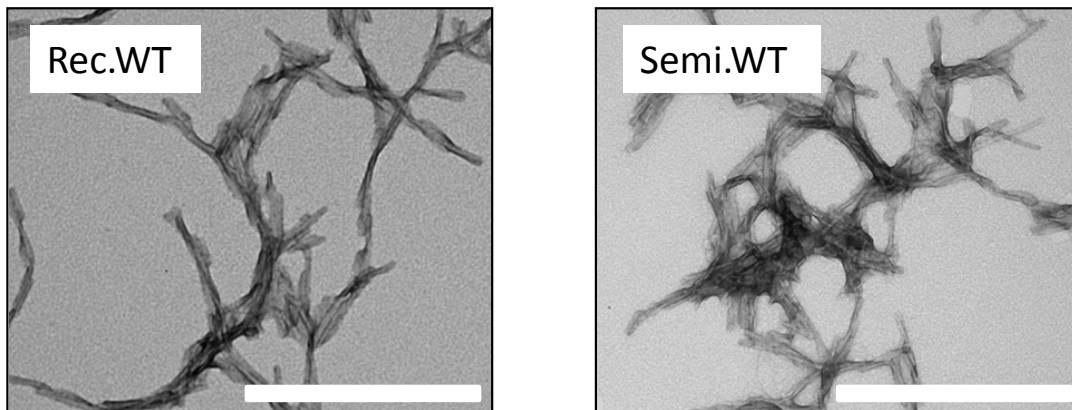

*Figure S14.* TEM images of recombinant WT and semisynthetic  $\alpha$ -syn incubated for 7 days on a rotating wheel at 37°C. The images are representative of 3 independent experiments. The scale bars represent 200nm.

VI. Analysis of HEK and HeLa cells and mouse neurons treated with pervanadate: detection of non-specific bands

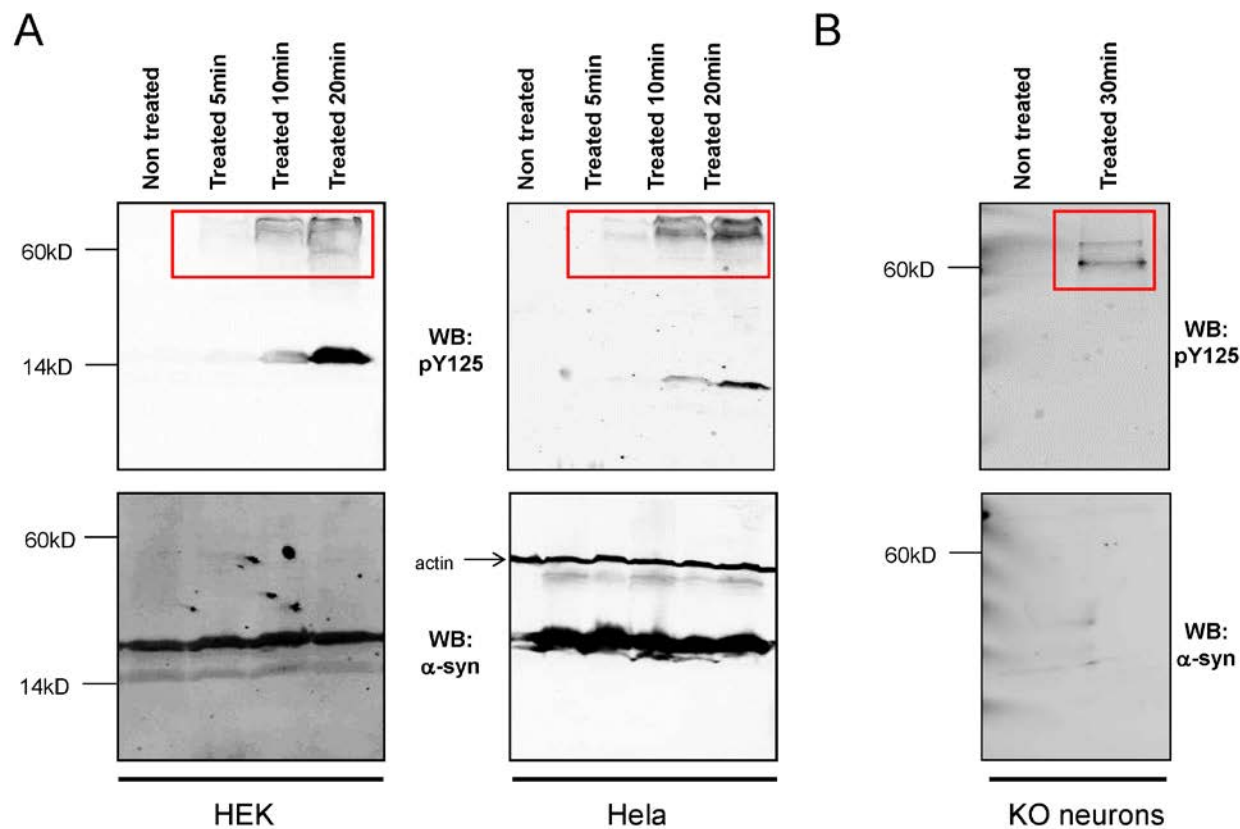

*Figure S15.* A. Immunoblots of HEK293 (left) and HeLa (right) cells over-expressing WT  $\alpha$ -syn and treated with pervanadate for 5, 10 and 20min. Membranes were probed with WT  $\alpha$ -syn (Biomol SA3400) and pY125 antibodies (BD Pharmigen). B. Immunoblots of mouse  $\alpha$ -syn KO primary neurons treated with pervanadate for 30min. Membranes were probed with WT  $\alpha$ -syn (BD transduction laboratory) and pY125 antibodies (BD Pharmigen).

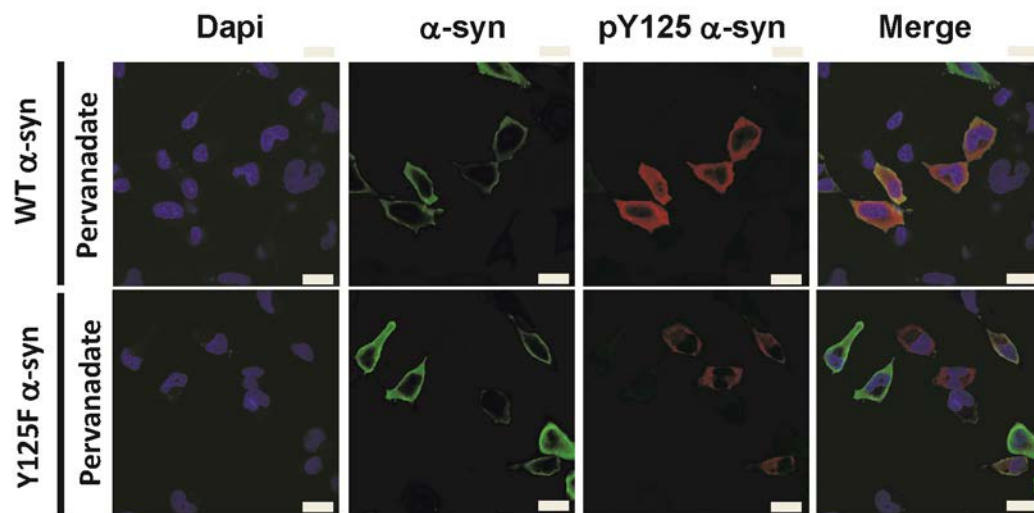

*Figure S16.* Confocal images of HeLa cells over-expressing WT or Y125F  $\alpha$ -syn and treated with pervanadate for 30min. The cells were fixed and stained with anti-pY125 antibody (BD pharmigen) and anti- $\alpha$ -syn (abcam).

VII . Cross-talk between  $\alpha$ -syn phosphorylation at S87 and Y125:  
*in vitro* phosphorylation assay

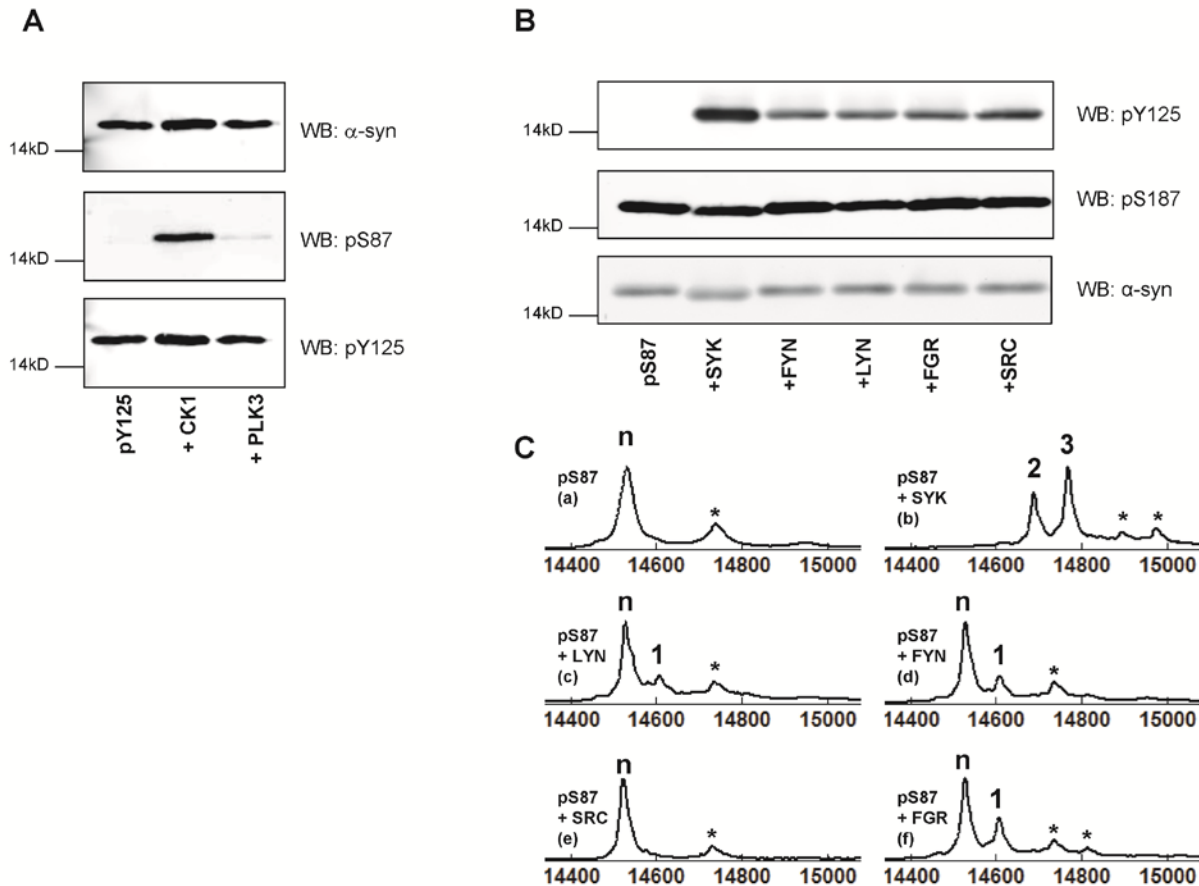

*Figure S17. A:* Immunoblots of pY125  $\alpha$ -syn phosphorylated using CK1 and PLK3. Membranes were probed using pS87, pY125, and  $\alpha$ -syn antibodies. **B:** Immunoblots of pS87  $\alpha$ -syn phosphorylated using Syk, Lyn, Fyn, c-Src, and c-Fgr. Membranes were probed for pY125, pS87, and  $\alpha$ -syn immunoreactivity. **D:** MALDI-TOF analysis of pS87  $\alpha$ -syn (a) phosphorylated by Syk (b), Lyn (c), Fyn (d), c-Src (e), and c-Fgr (f) after 14h of reaction. In all MALDI-TOF-MS spectra, the symbol ‘n’ indicates the starting material peak, while the numbers above other peaks correspond to the number of phosphorylation events, each detected by a +80 Da mass shift. The symbol ‘\*’ indicates a sinapinic acid matrix adduct.

*Supporting information for the figure S17:*

To obtain site-specific phosphorylation at S87, S129A  $\alpha$ -syn was incubated with CKI until phosphorylation at S87 was complete, then pS87  $\alpha$ -syn was purified by reversed-phase HPLC, and incubated with the tyrosine kinases in the same conditions as in the experiment with pS129  $\alpha$ -syn. Using first the mutant S129A  $\alpha$ -syn, we showed that the S129A mutation itself did not influence phosphorylation at Y125 (not shown). Using the purified pS87  $\alpha$ -syn, we observed that the behavior of pS87  $\alpha$ -syn is similar to that of pS129  $\alpha$ -syn and WT  $\alpha$ -syn: phosphorylation at Y125 by Syk is very efficient as judged by Western Blot (Supplementary Figure S17 B) but again not specific as shown by MALDI-TOF MS (Supplementary Figure S17 C (b)). We noted, however, that pS87  $\alpha$ -syn might be more efficiently phosphorylated at Y125 by Fyn than pS129  $\alpha$ -syn, since a single phosphorylation event could be seen with pS87  $\alpha$ -syn but not pS129  $\alpha$ -syn. However, Western-Blot data does not support a large effect.



## VIII- Complete references 5, 21, 30, 40 and 45

(5) Polymeropoulos, M. H.; Lavedan, C.; Leroy, E.; Ide, S. E.; Dehejia, A.; Dutra, A.; Pike, B.; Root, H.; Rubenstein, J.; Boyer, R.; Stenroos, E. S.; Chandrasekharappa, S.; Athanassiadou, A.; Papapetropoulos, T.; Johnson, W. G.; Lazzarini, A. M.; Duvoisin, R. C.; Di Iorio, G.; Golbe, L. I.; Nussbaum, R. L. *Science* **1997**, *276*, 2045.

(20) Inglis, K. J.; Chereau, D.; Brigham, E. F.; Chiou, S. S.; Schobel, S.; Frigon, N. L.; Yu, M.; Caccavello, R. J.; Nelson, S.; Motter, R.; Wright, S.; Chian, D.; Santiago, P.; Soriano, F.; Ramos, C.; Powell, K.; Goldstein, J. M.; Babcock, M.; Yednock, T.; Bard, F.; Basi, G. S.; Sham, H.; Chilcote, T. J.; McConlogue, L.; Griswold-Prenner, I.; Anderson, J. P. *J Biol Chem* **2009**, *284*, 2598.

(34) Paleologou, K. E.; Oueslati, A.; Shakked, G.; Rospigliosi, C. C.; Kim, H. Y.; Lamberto, G. R.; Fernandez, C. O.; Schmid, A.; Chegini, F.; Gai, W. P.; Chiappe, D.; Moniatte, M.; Schneider, B. L.; Aebischer, P.; Eliezer, D.; Zweckstetter, M.; Masliah, E.; Lashuel, H. A. *J Neurosci* **2010**, *30*, 3184.

(44) Ahn, B. H.; Rhim, H.; Kim, S. Y.; Sung, Y. M.; Lee, M. Y.; Choi, J. Y.; Wolozin, B.; Chang, J. S.; Lee, Y. H.; Kwon, T. K.; Chung, K. C.; Yoon, S. H.; Hahn, S. J.; Kim, M. S.; Jo, Y. H.; Min, D. S. *The Journal of biological chemistry* **2002**, *277*, 12334.

(49) Anderson, J. P.; Walker, D. E.; Goldstein, J. M.; de Laat, R.; Banducci, K.; Caccavello, R. J.; Barbour, R.; Huang, J.; Kling, K.; Lee, M.; Diep, L.; Keim, P. S.; Shen, X.; Chataway, T.; Schlossmacher, M. G.; Seubert, P.; Schenk, D.; Sinha, S.; Gai, W. P.; Chilcote, T. J. *J Biol Chem* **2006**, *281*, 29739.
